# Supplementary material
Source: publisher figshare collection journal article supplement (https://acs.figshare.com/ndownloader/files/14706698)
Supplement: Supplementary file 1 [file 14706698]

# Supporting Information

## Evaluation of real-world gaseous emissions performance of SCR and DPF bus retrofits

*Robin Smit<sup>1,4</sup>, Christos Keramydas<sup>1</sup>, Leonidas Ntziachristos<sup>2,\*</sup>,  
Ting-shek Lo<sup>3</sup>, Kwok-lam Ng<sup>3</sup>, Hok-lai Anson Wong<sup>3</sup>, Carol Ka-lok Wong<sup>3</sup>*

<sup>1</sup> EMISIA SA, Antoni Tritsi 21, GR 57001, Pylaia, Greece

<sup>2</sup> Laboratory of Heat Transfer and Environmental Engineering, Mechanical Engineering  
Department, Aristotle University Thessaloniki, GR 54124, Thessaloniki, Greece

<sup>3</sup> Environmental Protection Department, Hong Kong SAR Government

<sup>4</sup> University of Queensland, School of Civil Engineering, Brisbane, Australia

**\*Corresponding author.** Email: leon@auth.gr, tel: +306940770296, fax: +302310996013

Number of Pages: 6; Number of Tables: 2; Number of Figures: 2

## List of Tables

|                                                                                        |   |
|----------------------------------------------------------------------------------------|---|
| <b>Table S1.</b> 2016 Hong Kong Vehicle Emission Inventory.....                        | 2 |
| <b>Table S2.</b> Mean test conditions by test vehicle and retrofit configuration. .... | 3 |

## List of Figures

|                                                                                                                                                                             |   |
|-----------------------------------------------------------------------------------------------------------------------------------------------------------------------------|---|
| <b>Figure S1.</b> Histograms of exhaust gas temperature for each vehicle when equipped with an SCR<br>(Buses A1-A3 / left column) or SCRT (Buses B1-B3 / right column)..... | 4 |
| <b>Figure S2.</b> Pie charts showing contribution of vehicle types to travel and emissions. ....                                                                            | 5 |

**Table S1.** 2016 Hong Kong Vehicle Emission Inventory.

| <b>Veh</b>                   | <b>NOx<br/>(Tonnes)</b> | <b>PM10<br/>(Tonnes)</b> | <b>Population</b> | <b>VKT<br/>(million km)</b> |
|------------------------------|-------------------------|--------------------------|-------------------|-----------------------------|
| Motor Cycle                  | 140                     | <5                       | 50,900            | 310                         |
| Private Car                  | 450                     | 20                       | 531,000           | 5,500                       |
| Taxi                         | 3,000                   | <5                       | 18,300            | 2,900                       |
| Public Light Bus             | 750                     | 40                       | 4,300             | 440                         |
| Private Light Bus            | 140                     | <5                       | 4,300             | 130                         |
| Light Goods Vehicle          | 2,400                   | 80                       | 71,800            | 2,100                       |
| Medium & Heavy Goods Vehicle | 4,800                   | 150                      | 42,600            | 1,300                       |
| Non-franchised Bus           | 1,400                   | 40                       | 8,000             | 350                         |
| Single-Deck Franchised Bus   | 110                     | <5                       | 310               | 30                          |
| Double-Deck Franchised Bus   | 3,100                   | 70                       | 5,600             | 480                         |
| <b>Grand Total</b>           | <b>16,200</b>           | <b>420</b>               | <b>737,000</b>    | <b>13,600</b>               |

Remark: Numbers smaller than 5 are shown as "<5", numbers between 5 and 10 are rounded to the nearest integer, numbers between 10 and 1,000 are rounded to the nearest ten, numbers between 1,000 and 10,000 are rounded to the nearest hundred, and three significant figures are retained for the numbers greater than 10,000.

**Table S2.** Mean test conditions by test vehicle and retrofit configuration.

| Vehicle | Stage/ Retrofit Configuration | Average Speed (km/h) | Average Positive Acceleration (m/s <sup>2</sup> ) | Total Distance/ Hours Travelled (VKT/VHT) | Fuel Consumption (l/100km) | Ambient Temperature (°C) | Average Exhaust Temperature (°C) | Proportion Time Exhaust Temperature below 200°C (%) |
|---------|-------------------------------|----------------------|---------------------------------------------------|-------------------------------------------|----------------------------|--------------------------|----------------------------------|-----------------------------------------------------|
| A1      | S1 / DPF                      | 12                   | 0.30                                              | 86/7.4                                    | 96                         | 33                       | 274                              | 0.7                                                 |
|         | S2a / DPF+SCR                 | 11                   | 0.37                                              | 101/9.1                                   | 100                        | 33                       | 268                              | 1.0                                                 |
| A2      | S1 / DPF                      | 34                   | 0.24                                              | 486/14.3                                  | 51                         | 35                       | 360                              | < 0.1                                               |
|         | S2a / DPF+SCR                 | 34                   | 0.24                                              | 531/15.6                                  | 51                         | 33                       | 369                              | < 0.1                                               |
| A3      | S1 / DPF                      | 10                   | 0.38                                              | 81/8.4                                    | 113                        | 33                       | 309                              | 0.1                                                 |
|         | S2a / DPF+SCR                 | 14                   | 0.45                                              | 103/7.2                                   | 89                         | 19                       | 270                              | 2.4                                                 |
| B1      | S0 / No retrofit              | 9                    | 0.32                                              | 91/10.2                                   | 125                        | 22                       | 195                              | 52.3                                                |
|         | S1 / DPF                      | 8                    | 0.31                                              | 75/9.3                                    | 124                        | 19                       | 207                              | 31.4                                                |
|         | S2b / SCRT                    | 8                    | 0.29                                              | 108/13.5                                  | 140                        | 32                       | 264                              | 3.0                                                 |
| B2      | S0 / No retrofit              | 11                   | 0.27                                              | 101/9.5                                   | 105                        | 26                       | 237                              | 16.6                                                |
|         | S1 / DPF                      | 10                   | 0.28                                              | 130/12.7                                  | 113                        | 21                       | 259                              | 10.3                                                |
|         | S2b / SCRT                    | 10                   | 0.29                                              | 73/7.2                                    | 126                        | 31                       | 295                              | 5.9                                                 |
| B3      | S0 / No retrofit              | 34                   | 0.29                                              | 496/14.6                                  | 56                         | 22                       | 277                              | 4.1                                                 |
|         | S1 / DPF                      | 33                   | 0.33                                              | 528/16.0                                  | 58                         | 18                       | 308                              | 2.2                                                 |
|         | S2b / SCRT                    | 35                   | 0.27                                              | 459/13.1                                  | 57                         | 23                       | 341                              | < 0.1                                               |

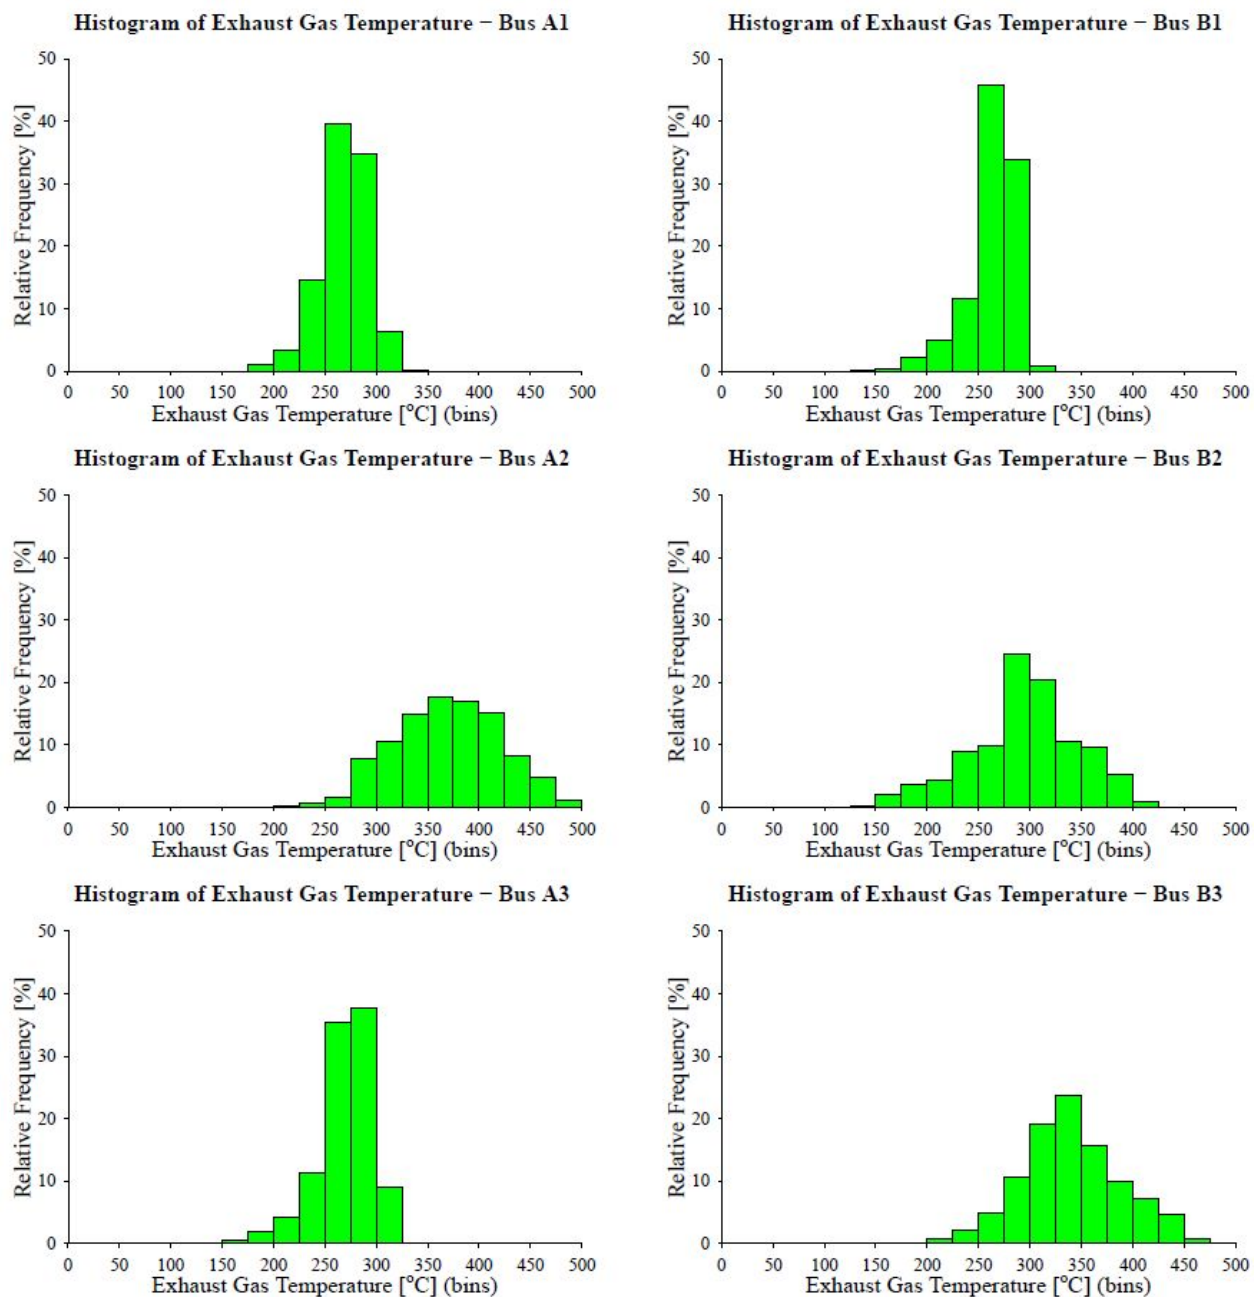

**Figure S1.** Histograms of exhaust gas temperature for each vehicle when equipped with an SCR (Buses A1-A3 / left column) or SCRT (Buses B1-B3 / right column).

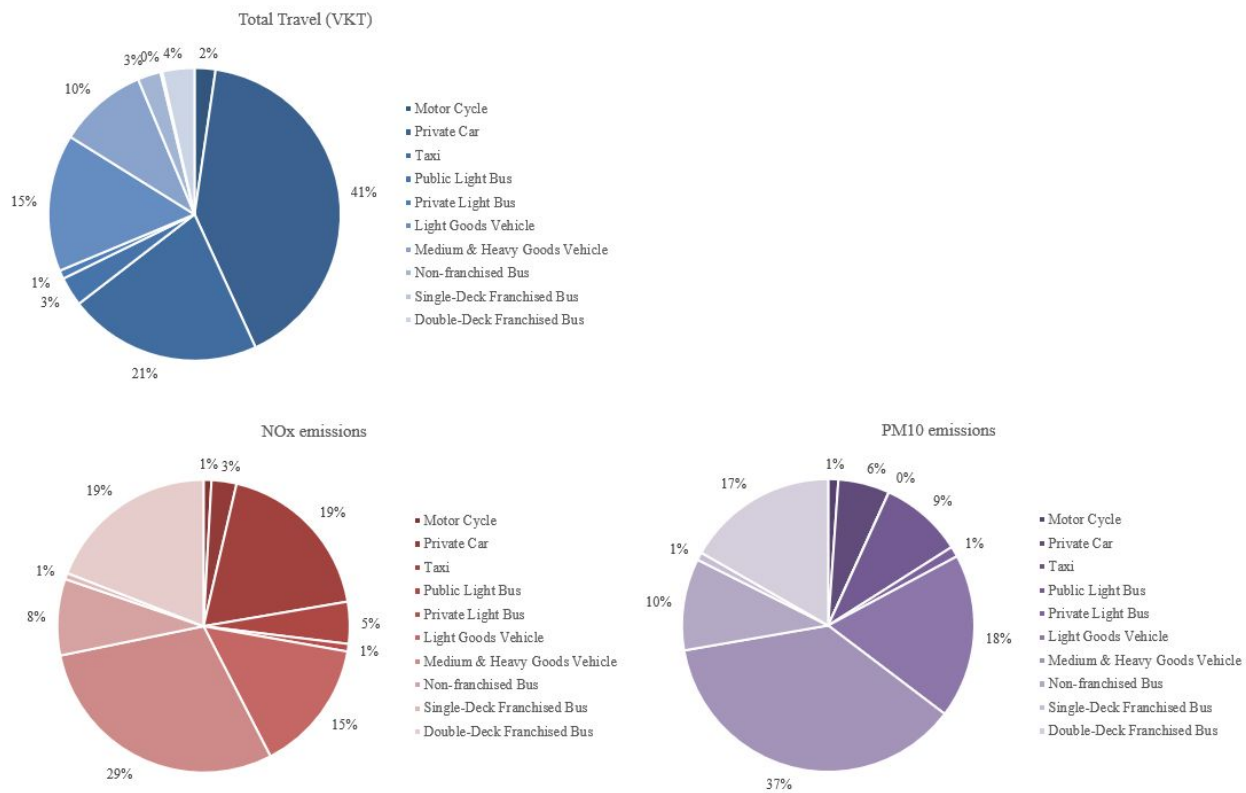

**Figure S2.** Pie charts showing contribution of vehicle types to travel and emissions.
